# Supplementary material for: Study on the differences in the oxidation characters of two chinese coals
Source: Royal Society of Chemistry journal article supplement (doi:10.1039/c6ra26168j), 2017-01-01
Supplement: c6ra26168j1.pdf [file c6ra26168j1.pdf]

## Study on the differences of oxidation characters of two Chinese coals

Guolan Dou and Xiaoxing Zhong\*

School of Safety Engineering, China University of Mining & Technology, Xuzhou 221116, China

### Supplemental Information (for online publication only)

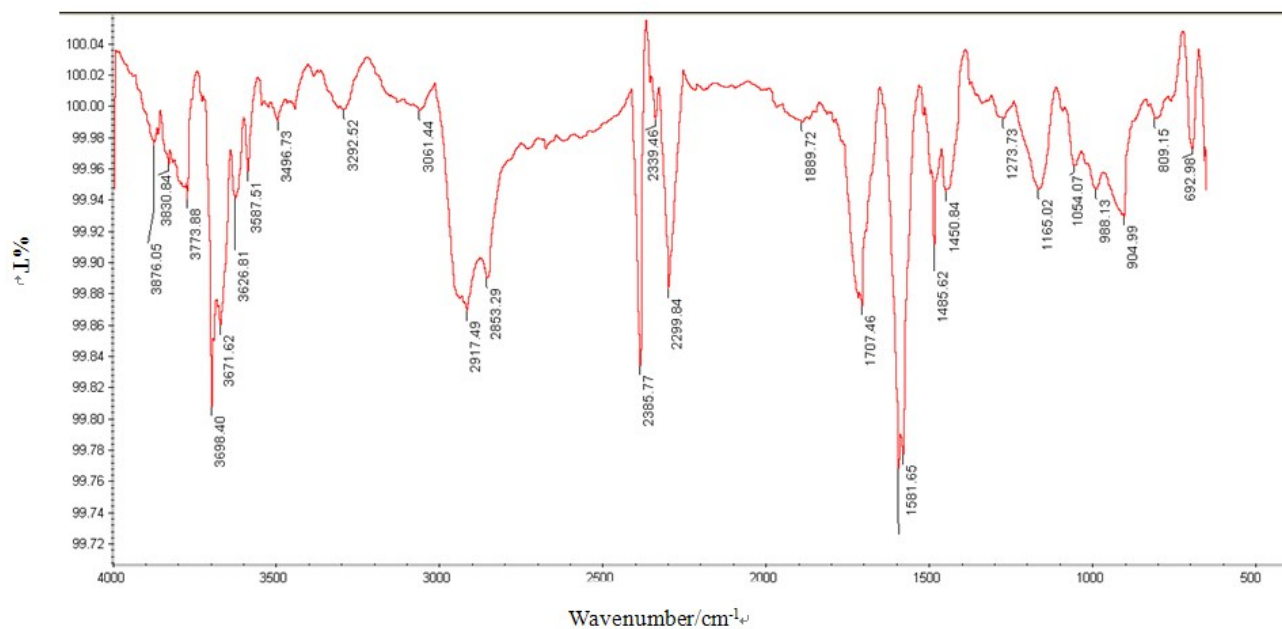

**Figure S1** The FTIR spectra of the extracted component of DFS coal in THF

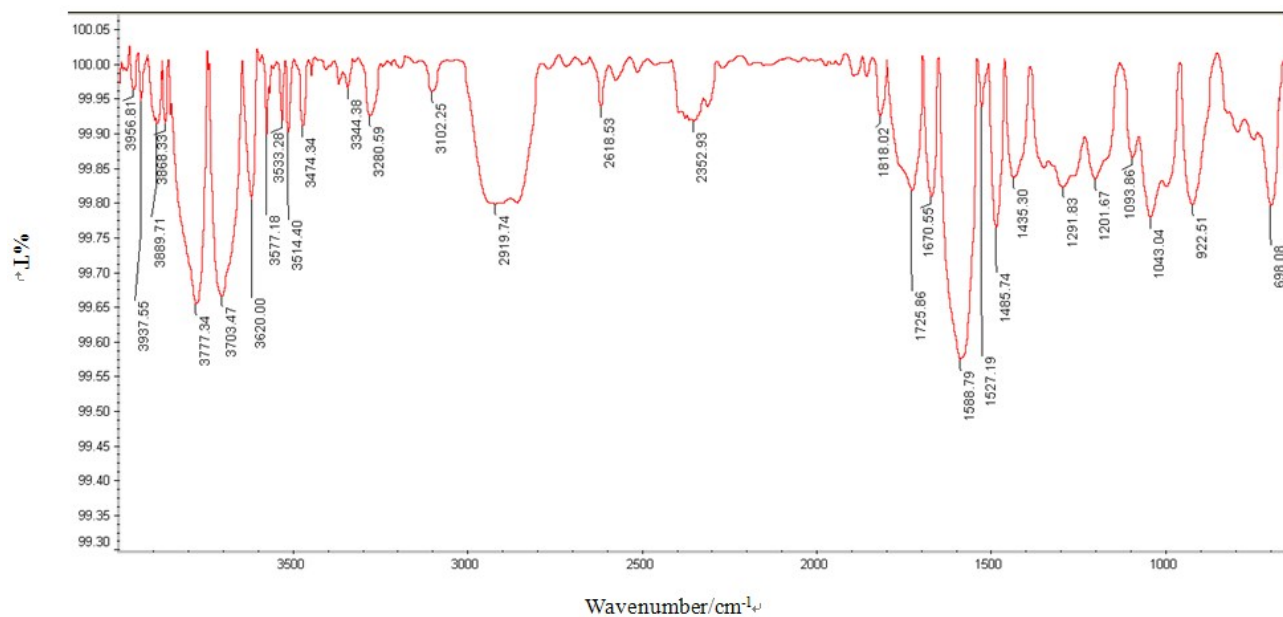

**Figure S2** The FTIR spectra of the extracted component of DFS coal in DFS
